1           **DEAD-box protein family member DDX28 is a negative regulator**  
2           **of HIF-2 $\alpha$  and eIF4E2-directed hypoxic translation**

3   **Sonia L. Evagelou<sup>1</sup>, Olivia Bebenek<sup>1</sup>, Erin J. Specker<sup>1</sup>, James Uniacke<sup>1,\*</sup>**

4   <sup>1</sup>**Department of Molecular and Cellular Biology, University of Guelph, 50 Stone Road East,**  
5   **Guelph, Ontario, Canada, N1G 2W1**

6   **\*Corresponding author:**

7   **James Uniacke: Department of Molecular and Cellular Biology, University of Guelph, 50**  
8   **Stone Road East, Guelph, Ontario, Canada N1G 2W1; [juniacke@uoguelph.ca](mailto:juniacke@uoguelph.ca); Tel.: 519-**  
9   **824-4120 ext. 54739**

10   **RUNNING TITLE: DDX28 negatively regulates HIF-2 $\alpha$**

11   **Abbreviations:** BrdU, bromodeoxyuridine; CCRCC, clear cell renal cell carcinoma; DDX28,  
12   DEAD box protein 28; EEF2, Eukaryotic Translation Elongation Factor 2; EGFR, Epidermal  
13   Growth Factor Receptor; eIF4E, eukaryotic initiation factor 4E; HIF, Hypoxia-inducible factor  
14   HSP90ab1, Heat Shock Protein 90 Alpha Family Class B Member 1; IGF1R, Insulin Like  
15   Growth Factor 1 Receptor; PEI, polyethylenamine; rHRE, RNA Hypoxia Response Elements

16   **Keywords:** Translation, hypoxia, HIF, DEAD-box protein, oxygen, eIF4E2

17   **Conflict of interest:** The authors declare that they have no conflicts of interest with the contents  
18   of this article.

## DDX28 negatively regulates HIF-2 $\alpha$

### 19 **ABSTRACT**

20 Hypoxia occurs when there is a deficiency in oxygen delivery to tissues and is connected to  
21 physiological and pathophysiological processes such as embryonic development, wound healing,  
22 heart disease and cancer. The master regulators of oxygen homeostasis in mammalian cells are  
23 the heterodimeric hypoxia-inducible transcription factors HIF-1 and HIF-2. The oxygen-labile  
24 HIF-2 $\alpha$  subunit has not only been implicated in transcription, but also as a regulator of eIF4E2-  
25 directed hypoxic translation. Here, we have identified the DEAD-box protein family member  
26 DDX28 as a novel interactor and negative regulator of HIF-2 $\alpha$  that suppresses its ability to  
27 activate eIF4E2-directed translation. We demonstrate that stable silencing of DDX28 via shRNA  
28 in hypoxic human U87MG glioblastoma cells caused an increase, relative to control, to: HIF-2 $\alpha$   
29 protein levels, the ability of eIF4E2 to bind the m<sup>7</sup>GTP cap structure, and the translation of select  
30 eIF4E2 target mRNAs. DDX28 depletion elevated both nuclear and cytoplasmic HIF-2 $\alpha$ , but  
31 HIF-2 $\alpha$  transcriptional activity did not increase possibly due to its already high nuclear  
32 abundance in hypoxic control cells. Depletion of DDX28 conferred a proliferative advantage to  
33 hypoxic, but not normoxic cells, which is likely a consequence of the translational upregulation  
34 of a subset of hypoxia-response mRNAs. DDX28 protein levels are reduced in several cancers,  
35 including glioma, relative to normal tissue. Therefore, we uncover a regulatory mechanism for  
36 this potential tumor suppressor in the repression of HIF-2 $\alpha$ - and eIF4E2-mediated translation  
37 activation of oncogenic mRNAs.

## 38 INTRODUCTION

39 The procurement for oxygen is a fundamental aspect of survival for aerobic organisms in all  
40 domains of life. Mammals have evolved complex circulatory, respiratory, and neuroendocrine  
41 systems to satisfy the need for molecular oxygen as the primary electron acceptor in oxidative  
42 phosphorylation, which supplies energy in the form of ATP [1]. The ability of a cell to acclimate  
43 to low oxygen (hypoxia or  $\leq 1\%$  O<sub>2</sub>), which usually arises due to an imbalance in supply and  
44 demand, is essential from the earliest stages of life [2, 3]. Hypoxia plays a role in several  
45 physiological and pathophysiological conditions such as embryonic development, muscle  
46 exercise, wound healing, cancer, heart disease, and stroke [4]. Prior to the establishment of  
47 uteroplacental circulation, embryonic cells receive only as much as 2% O<sub>2</sub>, and following  
48 oxygenation by maternal blood, the embryo still contains discrete regions of hypoxia [2, 5]. This  
49 form of physiological hypoxia helps govern the process of development through cell fate  
50 determination, angiogenesis, placentation, cardiogenesis, bone formation, and adipogenesis [3, 6-  
51 10]. Hypoxia is also a feature of the tumor microenvironment, and plays a key role in several  
52 cancer hallmarks toward tumor progression [11, 12]. The major cellular response to hypoxia is  
53 mediated by hypoxia-inducible transcription factors (HIF-1 and HIF-2). The HIFs are  
54 heterodimeric, composed of an oxygen-labile  $\alpha$ -subunit, HIF-1 $\alpha$  or HIF-2 $\alpha$ , and a constitutively  
55 expressed HIF-1 $\beta$  subunit [11]. HIF-1 and HIF-2 activate the transcription of hundreds of genes  
56 (some shared and some unique), including those involved in metabolism and erythropoiesis, in  
57 order to simultaneously reduce the activity of energy-expensive processes and promote the  
58 increased uptake of nutrients and oxygen [13]. Further investigation into the unique roles of HIF-  
59 1 $\alpha$  and HIF-2 $\alpha$ , and how they might be differentially regulated, will reveal novel insights into  
60 hypoxic gene expression.

## DDX28 negatively regulates HIF-2 $\alpha$

61 Unlike HIF-1 $\alpha$  that is more involved in acute hypoxia (< 24 h), HIF-2 $\alpha$  is linked to  
62 chronic hypoxia [14]. Further, HIF-2 $\alpha$  accumulates in both the cytoplasm and the nucleus [15].  
63 Indeed, HIF-2 $\alpha$ , but not HIF-1 $\alpha$ , participates in the recruitment of select hypoxia-response  
64 mRNAs to the translation apparatus [16], not only in hypoxia but in the low-range of  
65 physiological oxygen (< 8% O<sub>2</sub>) [17]. Hypoxia is a potent inhibitor of mammalian target of  
66 rapamycin complex 1, suppressing canonical cap-dependent translation by sequestering the cap-  
67 binding protein eukaryotic initiation factor 4E (eIF4E) [18-21]. Alternative modes of translation  
68 initiation are utilized during hypoxia including cap-independent mechanisms as well as non-  
69 canonical cap-dependent translation mediated by the eIF4E2 cap-binding protein. HIF-2 $\alpha$  and  
70 RBM4 recognize select mRNAs by binding to RNA Hypoxia Response Elements (rHREs) in  
71 their 3' UTRs and initiating their translation via the 5' cap through eIF4E2, eIF4G3 and eIF4A  
72 [16, 22]. HIF-2 $\alpha$  and eIF4E2 are essential for embryonic development [3, 23], and important  
73 contributors to tumor progression [24, 25], both hypoxia-driven processes. The protein levels of  
74 eIF4E2 do not change between normoxia and hypoxia [16, 17]. HIF-2 $\alpha$ , on the other hand, is  
75 constantly degraded in normoxia via a family of prolyl hydroxylases that are inhibited by  
76 hypoxia [11]. In hypoxia, it is mostly unclear how the activities of eIF4E2 or HIF-2 $\alpha$  are  
77 regulated with respect to translation initiation. A greater understanding of these mechanisms will  
78 shed light on how gene expression is coordinated in physiological and pathophysiological  
79 processes that are linked to hypoxia.

80 Here we demonstrate that the DEAD box protein DDX28 is a negative regulator of HIF-  
81 2 $\alpha$  protein levels in a human glioblastoma cell line. DDX28 has been detected in mitochondria,  
82 cytoplasm and nuclei [26]. However, known functions of DDX28 are limited to its RNAi-  
83 mediated silencing disrupting mitoribosome assembly [27, 28], which is also an outcome of

## DDX28 negatively regulates HIF-2 $\alpha$

84 hypoxia [29]. While it is known that hypoxia increases HIF-2 $\alpha$  levels, our data show that DDX28  
85 protein levels concurrently decrease. We also show that DDX28 interacts with HIF-2 $\alpha$ , but not  
86 HIF-1 $\alpha$  or the m<sup>7</sup>GTP cap structure. We demonstrate a link between these two observations by  
87 depleting DDX28 levels in hypoxia whereby an even greater increase to HIF-2 $\alpha$  levels was  
88 observed along with its effect on eIF4E2-dependent translation activation. Hypoxic depletion of  
89 DDX28 caused eIF4E2 and its mRNA targets to associate more with the m<sup>7</sup>GTP cap structure  
90 and polysomes, respectively. Furthermore, hypoxic depletion of DDX28 caused a significant  
91 increase to cell proliferation only in hypoxia. While HIF-2 $\alpha$  increased in both the nucleus and  
92 cytoplasm upon DDX28 depletion, there was no increase to its transcriptional activity. We  
93 propose a model where DDX28 reduction in hypoxia plays a role in HIF-2 $\alpha$  stabilization, but  
94 some DDX28 is still useful to restrain the HIF-2 $\alpha$ /eIF4E2 translational axis, which can be  
95 oncogenic [24, 25].

## 96 RESULTS

### 97 DDX28 interacts with HIF-2 $\alpha$ , but not HIF-1 $\alpha$ or eIF4E2

98 U87MG human glioblastoma cells were used in this study because they have previously been  
99 characterized as models for hypoxia research and the interaction between HIF-2 $\alpha$  and eIF4E2 in  
100 non-canonical cap-dependent translation [16, 17, 22, 24, 25]. When U87MG were exposed to  
101 hypoxia (1% O<sub>2</sub>) for 24 h, we not only observed an increase in HIF-2 $\alpha$ , but a concurrent  
102 decrease in DDX28 levels (Fig. 1A). Furthermore, when DDX28 was stably depleted via two  
103 independent shRNA sequences to produce two unique cell lines, the hypoxia-dependent increase  
104 in HIF-2 $\alpha$  was further increased relative to controls expressing a non-targeting shRNA (Fig. 1B).  
105 We next investigated whether DDX28 was directly involved in HIF-2 $\alpha$  regulation by performing  
106 a co-immunoprecipitation. Exogenous tagged proteins were used due to the lack of specificity of

## DDX28 negatively regulates HIF-2 $\alpha$

107 the antibodies for the endogenous protein or its low abundance. In hypoxic U87MG cells,  
108 exogenous GFP-HIF-2 $\alpha$ , but not GFP alone, co-immunoprecipitated with DDX28 (Fig. 1C).  
109 Since HIF-2 $\alpha$  is a known interactor of eIF4E2 at the 5' mRNA cap in hypoxia [16], we tested  
110 whether DDX28 was part of this complex. However, exogenous eIF4E2 co-immunoprecipitated  
111 with HIF-2 $\alpha$ , but not DDX28 (Fig. 1D). Further, to demonstrate specificity for the HIF-2 $\alpha$   
112 homolog, HIF-1 $\alpha$  did not co-immunoprecipitate with DDX28 (Fig. 1E). These data suggest that  
113 DDX28 interacts with a distinct pool of HIF-2 $\alpha$  that is not associated with eIF4E2.

### 114 **Depletion of DDX28 enhances the association of eIF4E2 with m<sup>7</sup>GTP and polyribosomes**

115 We performed m<sup>7</sup>GTP cap-binding assays to test whether the increased HIF-2 $\alpha$  levels in DDX28  
116 depleted cells had an effect on the translation initiation potential of eIF4E2. In hypoxia, eIF4E2  
117 bound more to m<sup>7</sup>GTP by  $1.6 \pm 0.1$  and  $1.5 \pm 0.2$  fold in two DDX28 depleted cell lines relative  
118 to control (Fig. 2A-B). Surprisingly, depletion of DDX28 in normoxia had an even greater effect  
119 on eIF4E2 binding to m<sup>7</sup>GTP with  $2.9 \pm 0.4$  and  $2.5 \pm 0.1$  fold increases relative to control (Fig.  
120 2C-D). These data are also in support of Fig. 1D that DDX28 does not bind the m<sup>7</sup>GTP cap.

121 m<sup>7</sup>GTP association of a cap-binding protein like eIF4E2 does not necessarily imply an  
122 increase in translation initiation [30]. Therefore we performed polysome fractionation to test  
123 whether eIF4E2 had a greater association with polysomes isolated from DDX28 depleted cells  
124 relative to controls in normoxia and hypoxia. Using densitometry to quantify total eIF4E2  
125 associated with monosomes (low translation; fractions 1-3) and polysomes (medium to high  
126 translation; fractions 4-9), we show that  $5 \pm 1.2\%$  of total eIF4E2 in normoxic control cells was  
127 associated with polysomes (Fig. 3A). In DDX28-depleted cells, the proportion of polysome-  
128 associated eIF4E2 increased to  $23 \pm 3.2\%$  (Fig. 3B). Hypoxic control cells displayed  $22 \pm 5.1\%$   
129 eIF4E2 associated with polysomes (Fig. 3C), an increase relative to normoxic control cells ( $5 \pm$

## DDX28 negatively regulates HIF-2 $\alpha$

130 1.2%; Fig. 3A). Hypoxic DDX28-depleted cells had an even greater proportion of eIF4E2  
131 associated with polysomes ( $41 \pm 4.1\%$ ) relative to hypoxic control cells (Fig. 3D). The polysome  
132 association of the canonical cap-binding protein eIF4E did not change in any condition (Fig. 3E).  
133 Our data show that hypoxia, or knockdown of DDX28 in normoxia, increased the proportion of  
134 polysome-associated eIF4E2 relative to normoxic control cells (Fig. 3F). However, DDX28  
135 depletion and hypoxia together significantly increased the polysome association of eIF4E2  
136 relative to normoxic control cells (Fig. 3F).

### 137 **Depletion of DDX28 increases the translation of eIF4E2 target transcripts in hypoxia**

138 We performed qRT-PCR on monosome and polysome fractions in normoxia and hypoxia to  
139 measure the DDX28-dependent association of eIF4E2 and eIF4E target transcripts. We chose  
140 Epidermal Growth Factor Receptor (*EGFR*) and Insulin Like Growth Factor 1 Receptor (*IGF1R*)  
141 mRNAs, previously characterized as eIF4E2-dependent transcripts due to the presence of an  
142 rHRE in their 3' UTR [16, 17], and Eukaryotic Translation Elongation Factor 2 (*EEF2*) and Heat  
143 Shock Protein 90 Alpha Family Class B Member 1 (*HSP90ab1*) mRNAs previously  
144 characterized as eIF4E-dependent transcripts due to the presence of a 5' terminal oligopyrimidine  
145 motif [17, 31]. We observed a significant increase in the association of *EGFR* mRNA with  
146 polysomes relative to monosomes from  $4.5 \pm 0.9$ -fold in controls to  $11.3 \pm 1.6$ -fold in DDX28  
147 depleted cells in hypoxia (Fig. 4A). Similarly, the polysome association of *IGF1R* mRNA  
148 significantly increased from  $3.2 \pm 0.3$  in controls to  $5.4 \pm 0.7$  in DDX28-depleted cells in  
149 hypoxia (Fig. 4A). In normoxia, there was no difference in the polysome-association of *EGFR*  
150 mRNA relative to monosomes between controls ( $3.5 \pm 0.5$ -fold) and DDX28 depleted cells ( $3.8$   
151  $\pm 0.5$ -fold) (Fig. 4B). Similarly, there was no statistical difference in the polysome-association of  
152 *IGF1R* mRNA relative to monosomes between controls ( $5.6 \pm 0.8$ -fold) and DDX28 depleted

## DDX28 negatively regulates HIF-2 $\alpha$

153 cells ( $3.5 \pm 0.5$ -fold) (Fig. 4B). Moreover, EGFR protein levels (Fig. 4C), but not total *EGFR*  
154 mRNA levels (Fig. 4D), increased in hypoxic DDX28-depleted cells relative to control. Neither  
155 of the eIF4E-dependent transcripts displayed significant changes in polysome-association in  
156 normoxia or hypoxia between DDX28-depleted and controls. The one exception was *EEF2*  
157 mRNA, which displayed a small significant increase in normoxic polysome-association relative  
158 to monosomes in DDX28-depleted cells ( $1.52 \pm 0.04$ ) compared to controls ( $1.05 \pm 0.06$ ) (Fig.  
159 4E). These data suggest that DDX28 depletion significantly increases the translation of eIF4E2-  
160 dependent, but not eIF4E-dependent, transcripts in hypoxia.

### 161 **Depletion of DDX28 in hypoxia increases cytoplasmic and nuclear HIF-2 $\alpha$ levels, but not its** 162 **nuclear activity**

163 Hypoxic cells were fractionated into cytoplasm and nuclei to measure the effects of DDX28  
164 depletion on HIF-2 $\alpha$  levels in both compartments. In accordance with the abovementioned  
165 observations that DDX28 depletion increases total HIF-2 $\alpha$  protein levels and its cytoplasmic  
166 activity (translation), we show that DDX28 depletion increased cytoplasmic HIF-2 $\alpha$  levels  
167 compared to control (Fig. 5A). However, we also observed an increase in the nuclear levels of  
168 HIF-2 $\alpha$ . Therefore, we investigated whether DDX28 depletion in hypoxia also increased the  
169 nuclear activity of HIF-2 $\alpha$  (transcription) by measuring the mRNA abundance from its gene  
170 targets relative to control. We chose six genes that contain Hypoxia Response Elements in their  
171 promoters that are more dependent on HIF-2 $\alpha$  than HIF-1 $\alpha$  [32-35]. None of the six genes  
172 displayed a significant increase in mRNA abundance in DDX28 depleted cells relative to control  
173 (Fig. 5B). In fact, two genes displayed significant decreases in mRNA abundance, albeit by two-  
174 fold at most. These data suggest that while both nuclear and cytoplasmic HIF-2 $\alpha$  levels increase  
175 in response to DDX28 depletion, the effect on HIF-2 $\alpha$  transcriptional activity is minimal.



## DDX28 negatively regulates HIF-2 $\alpha$

### 176 **DDX28 depletion causes an increase in cell viability and proliferation in hypoxia but not** 177 **normoxia**

178 We next investigated whether the increase in eIF4E2-directed translation in DDX28 depleted  
179 cells provided a benefit to cells by measuring their viability and proliferation in normoxia and  
180 hypoxia. To assess this, we monitored the number of viable DDX28 depleted and control cells  
181 over 72 h at 24 h intervals using crystal violet staining. We observed no significant differences in  
182 viability at 24, 48, or 72 h between normoxic DDX28 depleted and control cells (Fig. 6A).  
183 However, both hypoxic DDX28 depleted cell lines had significantly increased viability  
184 compared to control at each time interval (Fig. 6B). To measure proliferation, we monitored the  
185 incorporation of bromodeoxyuridine (BrdU) into the DNA of actively dividing cells via  
186 immunofluorescence. In normoxia, one DDX28 depleted cell line displayed a significant  
187 increase in BrdU incorporation relative to control (Fig. 6C). However, following 24 h of  
188 hypoxia, both DDX28 depleted cell lines displayed significant increases in BrdU incorporation  
189 relative to control (Fig. 6D). To test whether overexpressing exogenous DDX28 would have the  
190 opposite effect (decreased viability, proliferation, and HIF-2 $\alpha$  levels) in hypoxia, we generated  
191 two stable clonal U87MG cell lines expressing FLAG-DDX28 and a control expressing FLAG  
192 alone. We did not observe any significant differences in viability, proliferation, or HIF-2 $\alpha$  levels  
193 between the overexpressing cell lines relative to the control (Fig. S1A-E). The one exception was  
194 a decrease in viability after 24 h of hypoxia in one of the overexpressing cell lines relative to  
195 control, but this difference ceased at 48 h and 72 h. Since hypoxia appears to reduce the levels of  
196 exogenous DDX28 (Fig. S1E), it is possible that the overexpressing cell lines do not overexpress  
197 DDX28 enough in hypoxia to suppress HIF-2 $\alpha$  or that DDX28 is already suprastoichiometric to  
198 HIF-2 $\alpha$ . Our data suggest that depletion of DDX28 provides an increase to cell viability and

## DDX28 negatively regulates HIF-2 $\alpha$

199 proliferation in hypoxia likely through an increase in translation of select mRNAs and perhaps  
200 other unidentified pathways.

### 201 **DISCUSSION**

202 HIF-2 $\alpha$  and eIF4E2 contribute to the ability of a cell to adapt to hypoxic conditions through  
203 selective gene expression by transcriptional and translation regulation. We have previously  
204 shown that eIF4E2 knockdown represses hypoxic cell proliferation and survival, migration and  
205 invasion, and tumor growth [24, 25]. Furthermore, eIF4E2-directed translation is active in the  
206 low range of physiological oxygen where HIF-2 $\alpha$ , but not yet HIF-1 $\alpha$ , is stabilized (3-8% O<sub>2</sub>)  
207 [17]. Total levels of eIF4E2 protein are minimally altered upon hypoxic exposure [16, 17, 25,  
208 36], so how is it regulated? Post-translational modifications of eIF4E2 have been identified such  
209 as ISGylation [37], as well as protein interactors such as eIF4G3 and eIF4A [16, 22]. However,  
210 the stabilization of HIF-2 $\alpha$  is essential for eIF4E2 hypoxic activity [16] and is likely a more  
211 upstream regulatory step for eIF4E2-directed translation to be functional.

212 We have uncovered a new mode of HIF-2 $\alpha$  regulation that affects the activity of hypoxic  
213 translation via eIF4E2. HIF-2 $\alpha$  co-immunoprecipitated with DDX28 and eIF4E2 (Fig. 4C), but  
214 eIF4E2 did not co-immunoprecipitate with DDX28 (Fig. 4D). This suggests that DDX28  
215 interacts with a different pool of HIF-2 $\alpha$  than the one that interacts with eIF4E2. In agreement,  
216 DDX28 did not interact with the m<sup>7</sup>GTP cap structure (Fig. 2). However, the depletion of  
217 DDX28 did significantly increase the ability of eIF4E2 to associate with m<sup>7</sup>GTP, suggesting that  
218 its effect on HIF-2 $\alpha$  influences eIF4E2 activity. Indeed, eIF4E2 did associate more with  
219 polysomes upon DDX28 depletion (Fig. 3F). Mechanisms were initially proposed where HIF-2 $\alpha$   
220 acted at the 3' UTR rHRE of select mRNAs along with RBM4 to mediate joining of the 5' end  
221 and eIF4E2 [16, 22, 38]. It is important to note that cap-binding assays are performed with

## DDX28 negatively regulates HIF-2 $\alpha$

222 m<sup>7</sup>GTP bound to agarose beads and not to an mRNA [39]. Therefore, these data suggest that  
223 HIF-2 $\alpha$  could act directly on eIF4E2 to regulate its cap-binding potential (Fig. 7).

224 While depletion of DDX28 significantly increased the ability of eIF4E2 to bind m<sup>7</sup>GTP  
225 in both normoxia and hypoxia, it was surprising that this increase was greater in normoxia than  
226 in hypoxia (Fig. 2). This could indicate that DDX28 has increased relevance as a suppressor of  
227 eIF4E2 activity in normoxia, but while the polysome-associated eIF4E2 increased in DDX28  
228 depleted normoxic cells, it was not statistically significant (Fig. 3F). Further, the polysome  
229 association of eIF4E2 mRNA targets *EGFR* and *IGF1R* did not increase in normoxic DDX28  
230 depleted cells relative to control (Fig. 4B). In hypoxia, the effects of DDX28 depletion were not  
231 only observed on eIF4E2 m<sup>7</sup>GTP and polysome association, but here *EGFR* and *IGF1R* mRNAs  
232 were significantly more associated with polysomes relative to control (Fig. 4A). We speculate  
233 that depleting DDX28 in normoxia may increase the very low levels of HIF-2 $\alpha$  to levels still  
234 undetectable via western blot, but enough to significantly increase the cap-binding potential of  
235 eIF4E2. The relative increase in HIF-2 $\alpha$  in normoxic DDX28 depleted cells relative to control  
236 may be greater than that in hypoxic cells, but there could be an unmet requirement in normoxia  
237 for a threshold amount of total HIF-2 $\alpha$  protein to efficiently activate eIF4E2 and the translation  
238 of its mRNA targets. Unexpectedly, the increase in nuclear HIF-2 $\alpha$  upon DDX28 depletion in  
239 hypoxia did not produce subsequent increases to the transcription of its target genes (Fig. 5). We  
240 speculate that perhaps in hypoxic control cells, the HIF-2 $\alpha$  DNA binding sites are saturated.  
241 Conversely, the cytoplasmic HIF-2 $\alpha$  targets (i.e. eIF4E2, DDX28) are likely not saturated due to  
242 the much lower levels of HIF-2 $\alpha$  in this compartment relative to the nucleus.

243 Hypoxia decreases total DDX28 protein levels, but our data suggest that the remaining  
244 DDX28 is important to restrain the HIF-2 $\alpha$ /eIF4E2 translational axis. This brings into to question

## DDX28 negatively regulates HIF-2 $\alpha$

245 why a negative regulator of this pathway would be in place, given that the expression of rHRE-  
246 containing mRNAs contributes to hypoxic survival [25]. Dozens of eIF4E2 mRNA targets have  
247 been identified such as *EGFR*, *IGF1R*, *PDGFRA*, *CDH22* [16, 17, 22, 24], and these have all  
248 been characterized as oncogenes [24, 40, 41]. Therefore, while important for hypoxic adaptation,  
249 tight regulation of this pathway is likely required to prevent neoplastic transformation. Indeed,  
250 mining the data in The Pathology Atlas within The Human Protein Atlas, we found that DDX28  
251 is present in most tissues, but lost in the majority of cancers ( $n \geq 3$  patients per cancer type;  
252 available from [v18.proteinatlas.org](http://v18.proteinatlas.org) and [https://www.proteinatlas.org/ENSG00000182810-](https://www.proteinatlas.org/ENSG00000182810-DDX28/pathology)  
253 *DDX28/pathology*) [42]. Conversely, the presence of DDX28 is listed as a favorable prognostic  
254 marker in cases of renal cell carcinoma. More than 80% of all clear cell renal cell carcinomas  
255 (CCRCC), the most common form of renal cancer, contain inactivating mutations in the *VHL*  
256 gene that stabilize the HIF- $\alpha$  subunits in a hypoxia-independent manner [43]. The normoxic  
257 stabilization of HIF-2 $\alpha$  and activation of its oncogenic pathways that occurs in CCRCC could be  
258 antagonized by the presence of DDX28. This study was performed in U87MG glioblastoma  
259 cells, but since DDX28 appears to be expressed ubiquitously, it could function similarly in other  
260 tissues. We provide mechanistic insight into the regulation of HIF-2 $\alpha$  and eIF4E2-directed  
261 hypoxic translation, and support for DDX28 as a tumor suppressor and prognostic marker to  
262 deepen our understanding of cancer progression.

## 263 **METHODS**

### 264 **Cell Culture**

265 U87MG human glioblastoma cells (HTB-14) were obtained from the American Type Culture  
266 Collection and maintained as suggested. Normoxic cells were maintained at 37 °C in ambient O<sub>2</sub>  
267 levels (21%) and 5% CO<sub>2</sub> in a humidified incubator. Hypoxia was induced by culturing at 1% O<sub>2</sub>

## DDX28 negatively regulates HIF-2 $\alpha$

268 and 5% CO<sub>2</sub> at 37 °C for 24 h, unless otherwise stated, using an N<sub>2</sub>-balanced Whitley H35  
269 HypOxystation.

### 270 **Generation of Stable Cell Lines**

271 Two unique OmicsLink™ shRNA expression vectors (Genecopoeia) were used to target the  
272 coding sequence of human DDX28 [HSH014712-3-nU6 sequence 5'-ggtggactacatcttagag-3',  
273 HSH014712-3-nU6 sequence 5'-acgctgcaagattacatcc-3']. A non-targeting shRNA was used as a  
274 control. U87MG cells stably expressing C-terminal 3x FLAG tagged DDX28 were generated by  
275 transfecting cells with the OmicsLink™ pEZ-M14 EX-A3144-M14 expression vector encoding  
276 the human DDX28 coding sequence (Genecopoeia). Selection was initiated 48 h post-  
277 transfection using 1  $\mu$ g/mL puromycin or 400  $\mu$ g/mL G418, respectively, and single colonies  
278 were picked after seven days.

### 279 **Western Blot analysis**

280 Standard western blot protocols were used. Primary antibodies: anti-eIF4E2 (Genetex,  
281 GTX82524), anti-DDX28 (Abcam, ab70821), anti-eIF4E (Cell Signaling, C46H6) anti-GAPDH  
282 (Cell Signaling, D16H11), anti-RPL5 (Abcam, ab137617), anti-HIF-2 $\alpha$  (Novus, NB100-122),  
283 anti-FLAG (Sigma, F1804), anti- $\alpha$ -tubulin (GeneTex, GT114), anti-lamin a/c (Cell Signaling,  
284 2032), anti-GFP (Abcam, ab290), anti-HA (Santa Cruz, Y-11), anti- $\beta$ -Actin (Genetex, GT5512),  
285 and anti-EGFR (Proteintech, 18986-1-AP).

### 286 **Polysome Profiling and analysis**

287 Performed as described previously [17]. The total eIF4E2 or eIF4E signal was quantified by  
288 densitometry using Bio-Rad Image Lab software, and the percentage of eIF4E2 or eIF4E present  
289 in monosome and polysome fractions relative to the total signal was calculated.

290 **RNA Isolation and quantitative RT-PCR**

291 RNA was extracted from polysome fractions and qRT-PCR performed for Fig. 4A-B and E as  
292 previously described [17]. RNA extracted from cells for Fig. 4D and Fig. 5B using RiboZol<sup>TM</sup> as  
293 per manufacturer's instructions. RNA (4  $\mu$ g) was reverse transcribed using the high-capacity  
294 cDNA reverse transcription kit (Applied Biosystems). Primer sequences used (5'-3'): *CITED2*,  
295 CCT AAT GGG CGA GCA CAT ACA (forward) and CGT TCG TGG CAT TCA TGTT  
296 (reverse); *EEF2*, Forward TTC AAG TCA TTC TCC GAG A and Reverse AGA CAC GCT  
297 TCA CTG ATA; *EGFR*, GGA GAA CTG CCA GAA ACT GAC (forward) and GGG GTT CAC  
298 ATC CAT CTG (reverse); *EPO*, TGG AAG AGG ATG GAG GTC GG (forward) and AGA  
299 GTG GTG AGG CTG CGA A (reverse); *IGFBP3*, GCG CCA GGA AAT GCT AGT G  
300 (forward) and AAC TTG GGA TCA GAC ACC CG (reverse); *IGF1R*, CCA TTC TCA TGC  
301 CTT GGT CT (forward) and TGC AAG TTC TGG TTG TCG AG (reverse); *GAPDH*, GTC  
302 AAG GCT GAG AAC GGG A (forward) and CAA ATG AGC CCC AGC CTT C (reverse);  
303 *HSP90AB1*, TGT CCC TCA TCA TCA ATA CC (forward) and TCT TTA CCA CTG TCC  
304 AAC TT (reverse); *ITPRI*, CGG AGC AGG GTA TTG GAA CA (forward) and GGT CCA  
305 CTG AGG GCT GAA AC (reverse); *LOXL2*, CCC CCT GGA GAC TAC CTG TT (forward),  
306 GGA ACC ACC TAT GTG GCA GT (reverse); *OCT4*, GAT GTG GTC CGA GTG TGG TTC  
307 (forward) and TTG ATC GCT TGC CCT TCT G (reverse); *RPLP0*, AAC ATC TCC CCC TTC  
308 TCC (forward) and CCA GGA AGC GAG AAT GC (reverse); *RPL13A*, CAT AGG AAG CTG  
309 GGA GCA AG (forward) and GCC CTC CAA TCA GTC TTC TG (reverse). Relative fold  
310 change in expression was calculated using the  $\Delta\Delta$ CT method, and transcript levels were  
311 normalized to *RPLP0* and either *RPL13A* or *GAPDH*.

## DDX28 negatively regulates HIF-2 $\alpha$

### 312 **Immunoprecipitation and vectors**

313 Exogenous expression vectors used: FLAG-GFP-HIF-2 $\alpha$  in a pAdlox backbone was a gift from  
314 Dr. Stephen Lee (Miami), HA-HIF1 $\alpha$ -pcDNA3 was a gift from William Kaelin (Addgene  
315 plasmid # 18949; <http://n2t.net/addgene:18949>; RRID:Addgene\_18949), and FLAG-eIF4E2 was  
316 a gift from Dong-Er Zhang (Addgene plasmid # 17342 ; <http://n2t.net/addgene:17342> ;  
317 RRID:Addgene\_17342). Control vectors were of the same backbone and tag without a gene  
318 insert. Cells were transfected with 4  $\mu$ g DNA complexed with 20  $\mu$ g polyethylenamine (PEI)  
319 diluted in 600  $\mu$ L of lactate buffered saline (20 mM sodium lactate and 150 mM NaCl, pH 4.0).  
320 The DNA/PEI complexes were diluted in 2.4 mL DMEM without FBS or antibiotics and added  
321 to cells at 37  $^{\circ}$ C for 8 h followed by replenishing with complete media. Cells were lysed after 48  
322 h in 200  $\mu$ L lysis buffer [10 mM Tris-HCl (pH 7.4), 150 mM NaCl, 0.5 mM EDTA, 0.5% NP-  
323 40, 1X protease inhibitor cocktail (New England Biolabs)]. Lysates were centrifuged at 12,000  
324 rpm for 10 min at 4  $^{\circ}$ C and diluted with 500  $\mu$ L of dilution buffer [10 mM Tris-HCl (pH 7.4),  
325 150 mM NaCl, 0.5 mM EDTA, 1X protease inhibitor cocktail]. Protein (1 mg/mL) was  
326 incubated with 25  $\mu$ L of GFP-Trap magnetic micro beads (ChromoTek), or anti-FLAG M2  
327 magnetic beads (Sigma), or anti-HA magnetic beads (Pierce). Only GFP-Trap required pre-  
328 blocking with 3% BSA in TBS [50 mM Tris, 150 mM NaCl, pH 7.4] and washed as per the  
329 manufacturer's instructions. Immunoprecipitation was carried out for 1 h at 4  $^{\circ}$ C with rotation.  
330 The GFP beads were washed four times with a more stringent wash buffer [10 mM Tris-HCl (pH  
331 7.4), 500 mM NaCl, 0.5 mM EDTA, 0.1% NP-40] while FLAG and HA beads were washed four  
332 times with TBS. Proteins were eluted at 95  $^{\circ}$ C in 1X Laemmli sample buffer. Whole cell lysate  
333 (25  $\mu$ g) was used as the input.

## DDX28 negatively regulates HIF-2 $\alpha$

### 334 **Analysis of Cap-Binding Proteins**

335 Performed as previously described [39]. The eIF4E2 signal in input and cap-elution lanes was  
336 quantified by densitometry using Bio-Rad Image Lab software. The eIF4E2 signal in the DDX28  
337 knockdown cap-elution lane relative to control was normalized to the eIF4E2 input signal ratio.

### 338 **Cellular fractionation**

339 After 24h of hypoxia, cells were lysed in 400  $\mu$ L harvest buffer [10 mM HEPES, 50 mM NaCl,  
340 500 mM sucrose, 0.1 mM EDTA, 10 mM DTT, 2 mM NaF, 0.5% Triton-X100, 1X protease  
341 inhibitor cocktail]. Lysates were centrifuged at 8000 rpm for 10 min at 4  $^{\circ}$ C to pellet nuclei. The  
342 supernatant was collected as the cytoplasmic fraction and the nuclear pellet was washed twice  
343 with 800  $\mu$ L nuclear wash buffer [10 mM HEPES, 10 mM KCl, 0.1 mM EDTA, 0.1 mM EGTA,  
344 10 mM DTT, 2 mM NaF, 1X protease inhibitor cocktail] centrifuging at 13,000 rpm at 4  $^{\circ}$ C for 5  
345 and 10 min following washes. The nuclear pellet was resuspended in 400  $\mu$ L RIPA buffer [20  
346 mM Tris-HCl (pH 7.5), 10 mM NaCl, 1% NP-40, 0.1% SDS, 0.5% sodium deoxycholate, 1 mM  
347 EDTA, 10 mM DTT, 2 mM NaF, 1X protease inhibitor cocktail] and rotated at 4  $^{\circ}$ C for 15 min.  
348 Insoluble proteins were pelleted by centrifugation at 13,000 rpm for 10 min at 4  $^{\circ}$ C and the  
349 supernatant was collected as the nuclear fraction. Equal volumes of cytoplasmic and nuclear  
350 samples were mixed with 1X Laemmli sample buffer and boiled at 95  $^{\circ}$ C for 90 sec for western  
351 blot analysis.

### 352 **Viability assay**

353 For each indicated time point, 10,000 cells per well were plated in triplicate in a 24-well plate.  
354 The following day (day 0), cells were incubated at their indicated oxygen concentrations, and  
355 following each 24 h increment, cells were washed once with PBS and stained with 400  $\mu$ L of 1%  
356 crystal violet solution prepared in 20% methanol, with gentle rocking for 20 min at room



## DDX28 negatively regulates HIF-2 $\alpha$

357 temperature. Cells were gently washed with water to remove excess stain. Plates were air-dried  
358 overnight, and 400  $\mu$ L of 10 % acetic acid was added to each well and incubated on a shaker for  
359 20 min at room temperature for de-staining. The absorbance at 595 nm was measured using the  
360 ThermoMax microplate reader (Molecular Devices).

### 361 **Cell proliferation assay**

362 Cells (250,000) were seeded on coverslips and incubated at their indicated oxygen  
363 concentrations for 24 h prior to treatment with 10  $\mu$ mol/l bromodeoxyuridine (BrdU) cell  
364 proliferation labeling reagent (Sigma) for 1 h. Cells were washed with PBS and fixed in cold  
365 methanol for 10 min. Excess methanol was removed by washing for 5 min with PBS, and  
366 coverslips were incubated with 1:100 primary anti-bromodeoxyuridine antibody (RPN202; GE  
367 Healthcare) in the dark for 1 h. Coverslips were washed three times for 5 min with PBS and  
368 incubated with 2  $\mu$ g/mL goat anti-mouse Alexa Fluor 555 secondary antibody (Invitrogen), in  
369 the dark for 1 h at 37 °C. Cells were counterstained with Hoechst (1  $\mu$ g/mL) for 5 min, and  
370 coverslips were mounted on microscope slides using ProLong Gold antifade reagent  
371 (Invitrogen). Cells were imaged with the Nikon eclipse Ti-S inverted microscope. An average of  
372 200 cells were assessed for positive BrdU labeling per biological replicate.

### 373 **Statistical analyses**

374 Results are expressed as means  $\pm$  standard error of the mean (s.e.m) of at least three independent  
375 experiments. Experimental data were tested using unpaired two-tailed Student's t-test when only  
376 two means were compared, or a one-way ANOVA followed by Tukey's HSD test when three or  
377 more means were compared.  $P < 0.05$  was considered statistically significant using GraphPad  
378 Prism.

379 **AUTHOR CONTRIBUTIONS**

380 SLE, OB, and EJS performed experiments. SLE and JU planned experiments, analyzed data and  
381 wrote the manuscript. JU designed the study and provided all the resources.

382 **ACKNOWLEDGEMENTS**

383 This work was funded by the Natural Sciences and Engineering Council of Canada (NSERC)  
384 grant number 04807 to J.U. S.L.E. was supported by the NSERC Canada Graduate Scholarships-  
385 Master's (CGS M).

386 **REFERENCES**

- 387 1. Semenza, G. L. (2011) Oxygen sensing, homeostasis, and disease, *N Engl J Med.* **365**, 537-  
388 47.
- 389 2. Dunwoodie, S. L. (2009) The role of hypoxia in development of the Mammalian embryo, *Dev*  
390 *Cell.* **17**, 755-73.
- 391 3. Simon, M. C. & Keith, B. (2008) The role of oxygen availability in embryonic development  
392 and stem cell function, *Nat Rev Mol Cell Biol.* **9**, 285-96.
- 393 4. Semenza, G. L. (2000) HIF-1: mediator of physiological and pathophysiological responses to  
394 hypoxia, *J Appl Physiol (1985).* **88**, 1474-80.
- 395 5. Withington, S. L., Scott, A. N., Saunders, D. N., Lopes Floro, K., Preis, J. I., Michalick, J.,  
396 Maclean, K., Sparrow, D. B., Barbera, J. P. & Dunwoodie, S. L. (2006) Loss of Cited2 affects  
397 trophoblast formation and vascularization of the mouse placenta, *Dev Biol.* **294**, 67-82.
- 398 6. Amarilio, R., Viukov, S. V., Sharir, A., Eshkar-Oren, I., Johnson, R. S. & Zelzer, E. (2007)  
399 HIF1 $\alpha$  regulation of Sox9 is necessary to maintain differentiation of hypoxic  
400 prechondrogenic cells during early skeletogenesis, *Development.* **134**, 3917-28.
- 401 7. Jogi, A., Ora, I., Nilsson, H., Lindeheim, A., Makino, Y., Poellinger, L., Axelson, H. &  
402 Pahlman, S. (2002) Hypoxia alters gene expression in human neuroblastoma cells toward an  
403 immature and neural crest-like phenotype, *Proc Natl Acad Sci U S A.* **99**, 7021-6.
- 404 8. Licht, A. H., Muller-Holtkamp, F., Flamme, I. & Breier, G. (2006) Inhibition of hypoxia-  
405 inducible factor activity in endothelial cells disrupts embryonic cardiovascular development,  
406 *Blood.* **107**, 584-90.
- 407 9. Watson, E. D. & Cross, J. C. (2005) Development of structures and transport functions in the  
408 mouse placenta, *Physiology (Bethesda).* **20**, 180-93.
- 409 10. Yun, Z., Maecker, H. L., Johnson, R. S. & Giaccia, A. J. (2002) Inhibition of PPAR gamma  
410 2 gene expression by the HIF-1-regulated gene DEC1/Stra13: a mechanism for regulation of  
411 adipogenesis by hypoxia, *Dev Cell.* **2**, 331-41.
- 412 11. Majmundar, A. J., Wong, W. J. & Simon, M. C. (2010) Hypoxia-inducible factors and the  
413 response to hypoxic stress, *Mol Cell.* **40**, 294-309.
- 414 12. Semenza, G. L. (2012) Hypoxia-inducible factors: mediators of cancer progression and  
415 targets for cancer therapy, *Trends Pharmacol Sci.* **33**, 207-14.

DDX28 negatively regulates HIF-2 $\alpha$

- 416 13. Downes, N. L., Laham-Karam, N., Kaikkonen, M. U. & Yla-Herttuala, S. (2018)  
417 Differential but Complementary HIF1 $\alpha$  and HIF2 $\alpha$  Transcriptional Regulation, *Mol*  
418 *Ther.* **26**, 1735-1745.
- 419 14. Lin, Q., Cong, X. & Yun, Z. (2011) Differential hypoxic regulation of hypoxia-inducible  
420 factors 1 $\alpha$  and 2 $\alpha$ , *Mol Cancer Res.* **9**, 757-65.
- 421 15. Talks, K. L., Turley, H., Gatter, K. C., Maxwell, P. H., Pugh, C. W., Ratcliffe, P. J. &  
422 Harris, A. L. (2000) The expression and distribution of the hypoxia-inducible factors HIF-1 $\alpha$   
423 and HIF-2 $\alpha$  in normal human tissues, cancers, and tumor-associated macrophages, *Am J*  
424 *Pathol.* **157**, 411-21.
- 425 16. Uniacke, J., Holterman, C. E., Lachance, G., Franovic, A., Jacob, M. D., Fabian, M. R.,  
426 Payette, J., Holcik, M., Pause, A. & Lee, S. (2012) An oxygen-regulated switch in the protein  
427 synthesis machinery, *Nature.* **486**, 126-9.
- 428 17. Timpano, S. & Uniacke, J. (2016) Human Cells Cultured under Physiological Oxygen  
429 Utilize Two Cap-binding Proteins to recruit Distinct mRNAs for Translation, *J Biol Chem.* **291**,  
430 10772-82.
- 431 18. Brugarolas, J., Lei, K., Hurley, R. L., Manning, B. D., Reiling, J. H., Hafen, E., Witters, L.  
432 A., Ellisen, L. W. & Kaelin, W. G., Jr. (2004) Regulation of mTOR function in response to  
433 hypoxia by REDD1 and the TSC1/TSC2 tumor suppressor complex, *Genes Dev.* **18**, 2893-904.
- 434 19. Connolly, E., Braunstein, S., Formenti, S. & Schneider, R. J. (2006) Hypoxia inhibits protein  
435 synthesis through a 4E-BP1 and elongation factor 2 kinase pathway controlled by mTOR and  
436 uncoupled in breast cancer cells, *Mol Cell Biol.* **26**, 3955-65.
- 437 20. DeYoung, M. P., Horak, P., Sofer, A., Sgroi, D. & Ellisen, L. W. (2008) Hypoxia regulates  
438 TSC1/2-mTOR signaling and tumor suppression through REDD1-mediated 14-3-3 shuttling,  
439 *Genes Dev.* **22**, 239-51.
- 440 21. Liu, L., Cash, T. P., Jones, R. G., Keith, B., Thompson, C. B. & Simon, M. C. (2006)  
441 Hypoxia-induced energy stress regulates mRNA translation and cell growth, *Mol Cell.* **21**, 521-  
442 31.
- 443 22. Ho, J. J. D., Wang, M., Audas, T. E., Kwon, D., Carlsson, S. K., Timpano, S., Evagelou, S.  
444 L., Brothers, S., Gonzalgo, M. L., Krieger, J. R., Chen, S., Uniacke, J. & Lee, S. (2016) Systemic  
445 Reprogramming of Translation Efficiencies on Oxygen Stimulus, *Cell Rep.* **14**, 1293-1300.
- 446 23. Morita, M., Ler, L. W., Fabian, M. R., Siddiqui, N., Mullin, M., Henderson, V. C., Alain, T.,  
447 Fonseca, B. D., Karashchuk, G., Bennett, C. F., Kabuta, T., Higashi, S., Larsson, O., Topisirovic,  
448 I., Smith, R. J., Gingras, A. C. & Sonenberg, N. (2012) A novel 4EHP-GIGYF2 translational  
449 repressor complex is essential for mammalian development, *Mol Cell Biol.* **32**, 3585-93.
- 450 24. Kelly, N. J., Varga, J. F. A., Specker, E. J., Romeo, C. M., Coomber, B. L. & Uniacke, J.  
451 (2018) Hypoxia activates cadherin-22 synthesis via eIF4E2 to drive cancer cell migration,  
452 invasion and adhesion, *Oncogene.* **37**, 651-662.
- 453 25. Uniacke, J., Perera, J. K., Lachance, G., Francisco, C. B. & Lee, S. (2014) Cancer cells  
454 exploit eIF4E2-directed synthesis of hypoxia response proteins to drive tumor progression,  
455 *Cancer Res.* **74**, 1379-89.
- 456 26. Valgardsdottir, R., Brede, G., Eide, L. G., Frengen, E. & Prydz, H. (2001) Cloning and  
457 characterization of MDDX28, a putative dead-box helicase with mitochondrial and nuclear  
458 localization, *J Biol Chem.* **276**, 32056-63.
- 459 27. Antonicka, H. & Shoubridge, E. A. (2015) Mitochondrial RNA Granules Are Centers for  
460 Posttranscriptional RNA Processing and Ribosome Biogenesis, *Cell Rep.*

- 461 28. Tu, Y. T. & Barrientos, A. (2015) The Human Mitochondrial DEAD-Box Protein DDX28  
462 Resides in RNA Granules and Functions in Mitoribosome Assembly, *Cell Rep.*
- 463 29. Bousquet, P. A., Sandvik, J. A., Arntzen, M. O., Jeppesen Edin, N. F., Christoffersen, S.,  
464 Kregel, U., Pettersen, E. O. & Thiede, B. (2015) Hypoxia Strongly Affects Mitochondrial  
465 Ribosomal Proteins and Translocases, as Shown by Quantitative Proteomics of HeLa Cells, *Int J*  
466 *Proteomics*. **2015**, 678527.
- 467 30. Volpon, L., Osborne, M. J., Topisirovic, I., Siddiqui, N. & Borden, K. L. (2006) Cap-free  
468 structure of eIF4E suggests a basis for conformational regulation by its ligands, *EMBO J.* **25**,  
469 5138-49.
- 470 31. Thoreen, C. C., Chantranupong, L., Keys, H. R., Wang, T., Gray, N. S. & Sabatini, D. M.  
471 (2012) A unifying model for mTORC1-mediated regulation of mRNA translation, *Nature*. **485**,  
472 109-13.
- 473 32. Aprelikova, O., Wood, M., Tackett, S., Chandramouli, G. V. & Barrett, J. C. (2006) Role of  
474 ETS transcription factors in the hypoxia-inducible factor-2 target gene selection, *Cancer Res.* **66**,  
475 5641-7.
- 476 33. Elvidge, G. P., Glenny, L., Appelhoff, R. J., Ratcliffe, P. J., Ragoussis, J. & Gleadle, J. M.  
477 (2006) Concordant regulation of gene expression by hypoxia and 2-oxoglutarate-dependent  
478 dioxygenase inhibition: the role of HIF-1 $\alpha$ , HIF-2 $\alpha$ , and other pathways, *J Biol Chem.*  
479 **281**, 15215-26.
- 480 34. Hu, C. J., Sataur, A., Wang, L., Chen, H. & Simon, M. C. (2007) The N-terminal  
481 transactivation domain confers target gene specificity of hypoxia-inducible factors HIF-1 $\alpha$   
482 and HIF-2 $\alpha$ , *Mol Biol Cell*. **18**, 4528-42.
- 483 35. Isono, T., Chano, T., Yoshida, T., Kageyama, S., Kawauchi, A., Suzaki, M. & Yuasa, T.  
484 (2016) Hydroxyl-HIF2- $\alpha$  is potential therapeutic target for renal cell carcinomas, *Am J*  
485 *Cancer Res.* **6**, 2263-2276.
- 486 36. Yi, T., Papadopoulos, E., Hagner, P. R. & Wagner, G. (2013) Hypoxia-inducible factor-  
487 1 $\alpha$  (HIF-1 $\alpha$ ) promotes cap-dependent translation of selective mRNAs through up-  
488 regulating initiation factor eIF4E1 in breast cancer cells under hypoxia conditions, *J Biol Chem.*  
489 **288**, 18732-42.
- 490 37. Okumura, F., Zou, W. & Zhang, D. E. (2007) ISG15 modification of the eIF4E cognate  
491 4EHP enhances cap structure-binding activity of 4EHP, *Genes Dev.* **21**, 255-60.
- 492 38. Melanson, G., Timpano, S. & Uniacke, J. (2017) The eIF4E2-Directed Hypoxic Cap-  
493 Dependent Translation Machinery Reveals Novel Therapeutic Potential for Cancer Treatment,  
494 *Oxid Med Cell Longev.* **2017**, 6098107.
- 495 39. Timpano, S., Melanson, G., Evagelou, S. L., Guild, B. D., Specker, E. J. & Uniacke, J.  
496 (2016) Analysis of Cap-binding Proteins in Human Cells Exposed to Physiological Oxygen  
497 Conditions, *J Vis Exp.*
- 498 40. Kuehn, B. M. (2010) Genomics illuminates a deadly brain cancer, *JAMA*. **303**, 925-7.
- 499 41. Yarden, Y. & Sliwkowski, M. X. (2001) Untangling the ErbB signalling network, *Nat Rev*  
500 *Mol Cell Biol.* **2**, 127-37.
- 501 42. Uhlen, M., Zhang, C., Lee, S., Sjostedt, E., Fagerberg, L., Bidkhori, G., Benfeitas, R., Arif,  
502 M., Liu, Z., Edfors, F., Sanli, K., von Feilitzen, K., Oksvold, P., Lundberg, E., Hober, S.,  
503 Nilsson, P., Mattsson, J., Schwenk, J. M., Brunnstrom, H., Glimelius, B., Sjoblom, T., Edqvist,  
504 P. H., Djureinovic, D., Micke, P., Lindskog, C., Mardinoglu, A. & Ponten, F. (2017) A  
505 pathology atlas of the human cancer transcriptome, *Science*. **357**.

DDX28 negatively regulates HIF-2 $\alpha$

506 43. Razafinjatovo, C., Bihr, S., Mischo, A., Vogl, U., Schmidinger, M., Moch, H. & Schraml, P.  
507 (2016) Characterization of VHL missense mutations in sporadic clear cell renal cell carcinoma:  
508 hotspots, affected binding domains, functional impact on pVHL and therapeutic relevance, *BMC*  
509 *Cancer*. **16**, 638.

510  
511 **FIGURE LEGENDS**

512 **Figure 1. DDX28 interacts with HIF-2 $\alpha$ , but not HIF-1 $\alpha$  or eIF4E2.** (A) Western blot of total  
513 HIF-2 $\alpha$  and DDX28 protein levels in normoxia (21% O<sub>2</sub>) and hypoxia (1% O<sub>2</sub>). GAPDH used as  
514 a loading control. (B) Western blot of DDX28 and HIF-2 $\alpha$  (arrow, hypoxia-inducible lower  
515 band) normoxic and hypoxic protein levels in control (Ctrl) cells stably expressing a non-  
516 targeting shRNA or in cells stably expressing one of two shRNAs targeting DDX28 mRNA:  
517 Knockdown (KD) 1 and KD2. Actin used as a loading control. (C) GFP co-immunoprecipitation  
518 in hypoxic cells stably expressing FLAG-DDX28 and transfected with recombinant GFP-HIF-  
519 2 $\alpha$ . Cells transfected with no DNA (-) or GFP alone were used as controls. (D) FLAG co-  
520 immunoprecipitation of recombinant FLAG-eIF4E2 from hypoxic cells co-transfected with HA-  
521 HIF-2 $\alpha$ . Cells transfected with empty FLAG vector used as control. (E) FLAG co-  
522 immunoprecipitation in hypoxic cells stably expressing FLAG-DDX28 and transfected with  
523 recombinant HA-HIF-1 $\alpha$ . Cells transfected with empty FLAG vector used as control. SE, short  
524 exposure; LE, long exposure. 25  $\mu$ g of whole cell lysate was used as input. Experiments  
525 performed in U87MG glioblastoma.

526 **Figure 2. Knockdown of DDX28 increases the cap-binding affinity of eIF4E2.** Western blot  
527 and quantification of eIF4E2 capture with m<sup>7</sup>GTP-bound agarose beads in cells stably expressing  
528 one of two distinct shRNA sequences targeting DDX28 in 1% O<sub>2</sub> hypoxia (A-B) and 21% O<sub>2</sub>  
529 normoxia (C-D). 35  $\mu$ g of whole cell lysate was used as the input. Ctrl, control cells stably  
530 expressing non-targeting shRNA; KD1 and KD2, knockdown cells stably expressing one of two

## DDX28 negatively regulates HIF-2 $\alpha$

531 distinct shRNA sequences targeting DDX28; LE, long exposure. Data ( $n \geq 3$ ), mean  $\pm$  s.e.m  
532 normalized to input. \* represents  $p < 0.05$  using  
533 one sample t-test against hypothetical mean ( $\mu = 1$ ). Experiments performed in U87MG  
534 glioblastoma.

### 535 **Figure 3. Knockdown of DDX28 increases polysome-associated eIF4E2 only in hypoxia.**

536 Polysomal distribution of DDX28, eIF4E2 and eIF4E protein measured by western blot in  
537 control cells stably expressing non-targeting shRNA in 21% O<sub>2</sub> normoxia (A) and 1% O<sub>2</sub>  
538 hypoxia (C) and in Knockdown (KD) cells stably expressing an shRNA targeting DDX28 in  
539 normoxia (B) and hypoxia (D). Ribosomal protein L5 (rpL5) used as a marker of protein  
540 integrity in each fraction. The eIF4E (E) or eIF4E2 (F) protein associated with polysomes  
541 (fractions 4-9) as a percentage of total protein (fractions 1-9) was quantified by densitometry.  
542 Data ( $n = 3$ ), mean  $\pm$  s.e.m. \* represents  $p < 0.05$  using one-way ANOVA and Tukey's HSD  
543 post-hoc test. Experiments performed in U87MG glioblastoma.

### 544 **Figure 4. Depletion of DDX28 increases the polysome association of eIF4E2-dependent**

545 **transcripts in hypoxia.** The association of eIF4E2-dependent transcripts Epidermal Growth  
546 Factor Receptor (EGFR) and Insulin Like Growth Factor 1 Receptor (IGF1R) with polysomes  
547 (fractions 4-9 from Fig. 3) was measured relative to monosomes (fractions 1-3) by qRT-PCR in  
548 control cells expressing a non-targeting shRNA or Knockdown (KD) cells stably expressing an  
549 shRNA targeting DDX28 in 1% O<sub>2</sub> hypoxia (A) and 21% O<sub>2</sub> normoxia (B). Western blot of total  
550 EGFR, DDX28, and Actin protein levels (C) or qRT-PCR of total EGFR mRNA levels  
551 normalized to endogenous control genes RPLP0 and RPL13A (D) in hypoxic control cells or  
552 DDX28 KD cells. (E) The association of eIF4E-dependent transcripts Eukaryotic Translation  
553 Elongation Factor 2 (EEF2) and Heat Shock Protein 90 Alpha Family Class B Member 1

## DDX28 negatively regulates HIF-2 $\alpha$

554 (HSP90ab1) with polysomes was measured relative to monosomes by qRT-PCR in control cells  
555 or DDX28 KD cells in hypoxia and normoxia. Data ( $n \geq 3$ ), mean  $\pm$  s.e.m. \* represents  $p < 0.05$   
556 using unpaired two-sample t-test except in (D) a one-sample t-test against a hypothetical mean ( $\mu$   
557 = 1).

558 **Figure 5. Depletion of DDX28 in hypoxia increases cytoplasmic and nuclear HIF-2 $\alpha$  levels,**  
559 **but not its nuclear activity.** (A) Western blot of HIF-2 $\alpha$  protein levels in cytoplasmic and  
560 nuclear fractions of control cells expressing a non-targeting shRNA or Knockdown (KD) cells  
561 stably expressing an shRNA targeting DDX28 in 1% O<sub>2</sub> hypoxia. Lamin a/c used as nuclear  
562 marker and  $\alpha$ -tubulin as cytoplasmic marker. (B) The mRNA abundance of HIF-2 $\alpha$  gene targets  
563 in hypoxia measured via qRT-PCR. Data ( $n \geq 3$ ), mean  $\pm$  s.e.m. represented as log<sub>2</sub> (fold change)  
564 in DDX28 KD cells relative to control cells and normalized to endogenous control genes RPLP0  
565 and RPL13A. \* represents  $p < 0.05$  using a one-sample t-test against hypothetical mean ( $\mu = 0$ ).  
566 CITED2, Cbp/P300-Interacting Transactivator 2; EPO, Erythropoietin; IGFBP3, Insulin Like  
567 Growth Factor Binding Protein 3; ITPR1, inositol 1,4,5-trisphosphate receptor type 1; LOXL2,  
568 Lysyl Oxidase Like 2; OCT4, octamer-binding transcription factor 4. Experiments performed in  
569 U87MG glioblastoma.

570 **Figure 6. DDX28 depletion causes an increase in cell viability and proliferation only in**  
571 **hypoxia.** Viable cell counts were measured with crystal violet staining after 24 h, 48 h, and 72 h  
572 in 21% O<sub>2</sub> normoxia (A) and 1% O<sub>2</sub> hypoxia (B) for control cells expressing a non-targeting  
573 shRNA or Knockdown cells stably expressing one of two shRNAs targeting DDX28 (KD1 and  
574 KD2). All absolute cell count values were normalized to the number of cells present on day 0 for  
575 each individual independent experiment, representing the fold change in the number of cells at  
576 each time point relative to day 0. Proliferation was measured as % BrdU-positive control and

## DDX28 negatively regulates HIF-2 $\alpha$

577 DDX28 KD cells via immunofluorescence after 24 h in normoxia (C) or hypoxia (D). Data (n  $\geq$   
578 3), mean  $\pm$  s.e.m. \* represents p < 0.05 using an unpaired two-sample t-test. Experiments  
579 performed in U87MG glioblastoma.

580 **Figure 7. Model of HIF-2 $\alpha$  regulation via DDX28.** (A) In situations of low DDX28 such as 1%  
581 O<sub>2</sub> hypoxia or shRNA depletion of DDX28 in normoxia, HIF-2 $\alpha$  becomes more stabilized and  
582 shifts the balance toward complex formation with eIF4E2 and a higher affinity for the m<sup>7</sup>GTP 5'  
583 cap structure. This, along with the binding of known interactors eIF4G3, eIF4A and RBM4,  
584 induces the translation of transcripts harboring RNA hypoxia response elements (rHRE) in their  
585 3'UTR. (B) Steady-state or “normal” DDX28 levels observed in normoxia contribute to the  
586 normoxic decrease in HIF-2 $\alpha$  protein levels through binding with DDX28 and shifts the balance  
587 away from the formation of an activating complex with eIF4E2, repressing this non-canonical  
588 cap-dependent translation pathway. Since depleting DDX28 in hypoxia activates eIF4E2-  
589 dependent translation even further, we propose that some DDX28 is required in hypoxia to  
590 restrain this oncogenic pathway.



**Figure 1**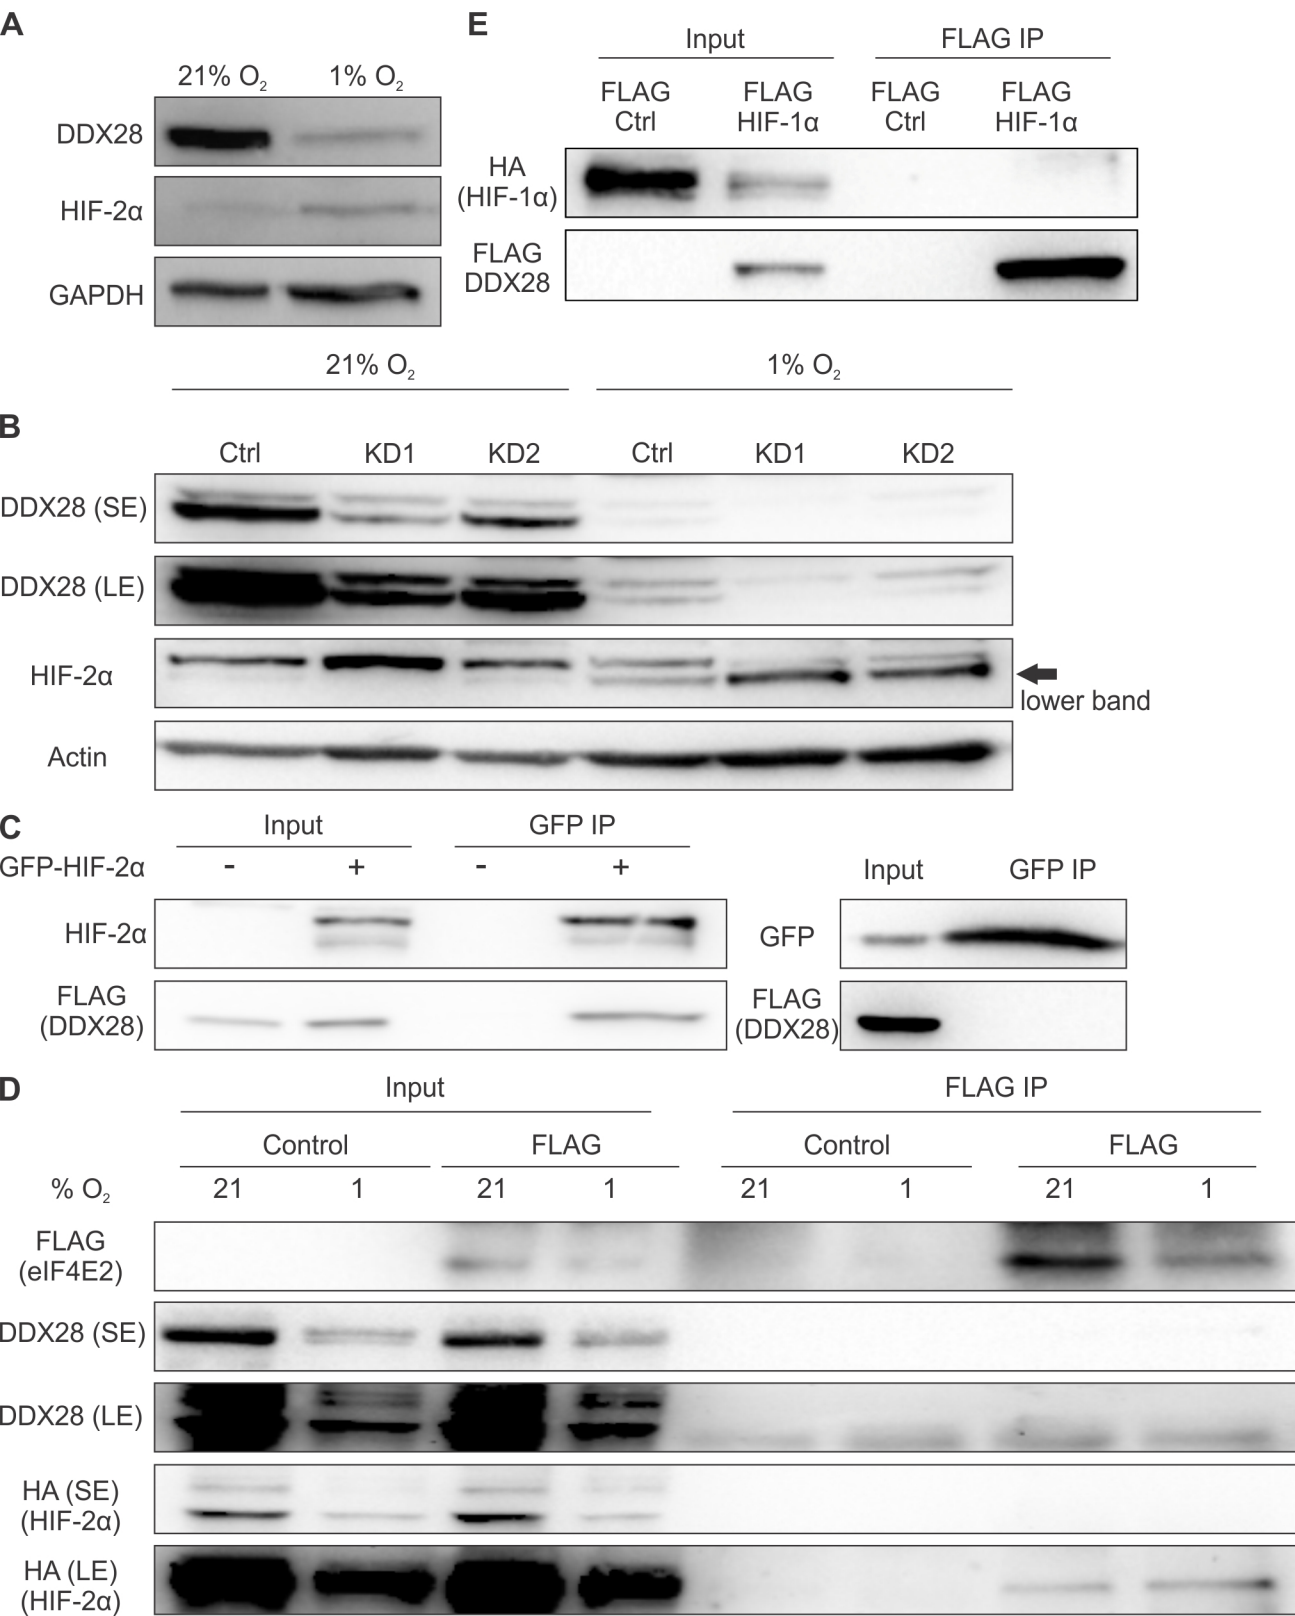

**Figure 2**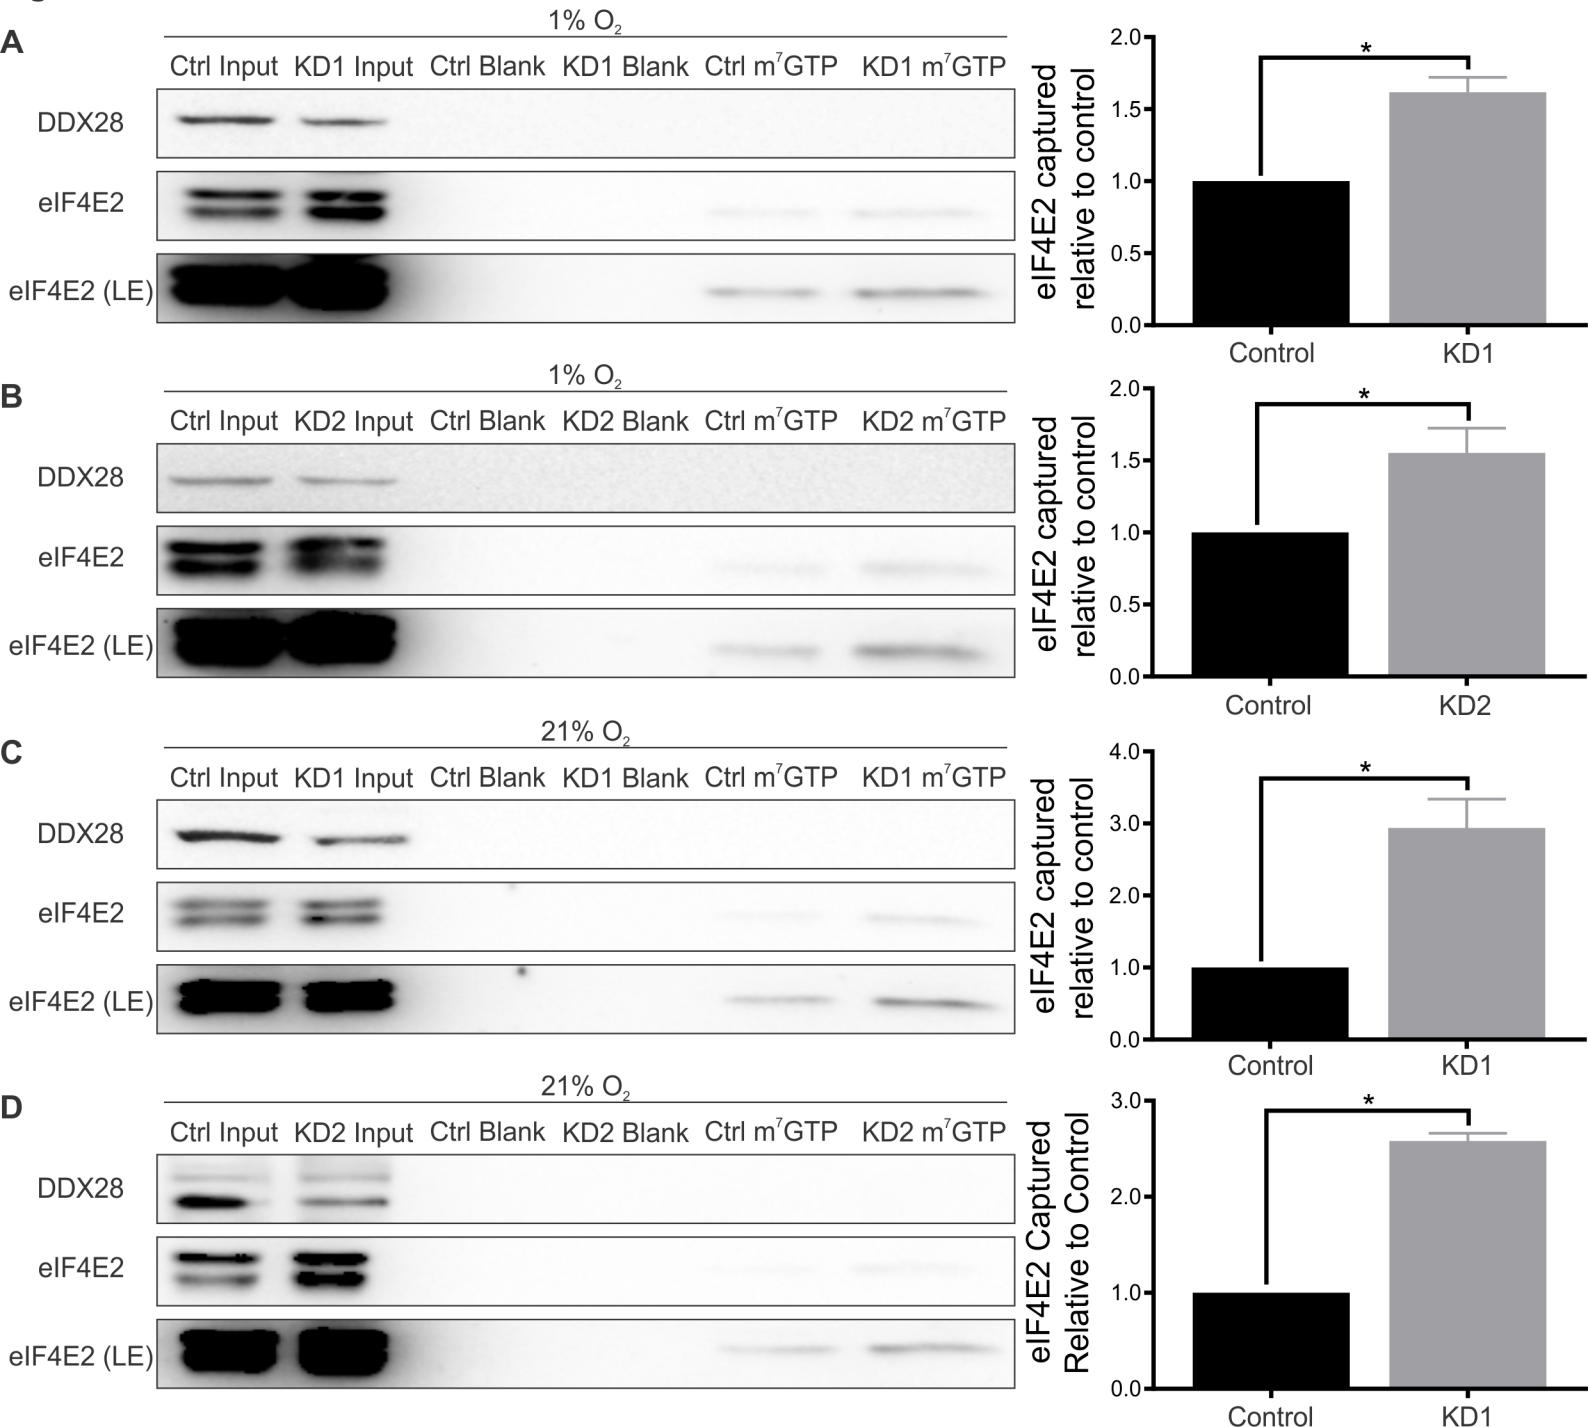

**Figure 3**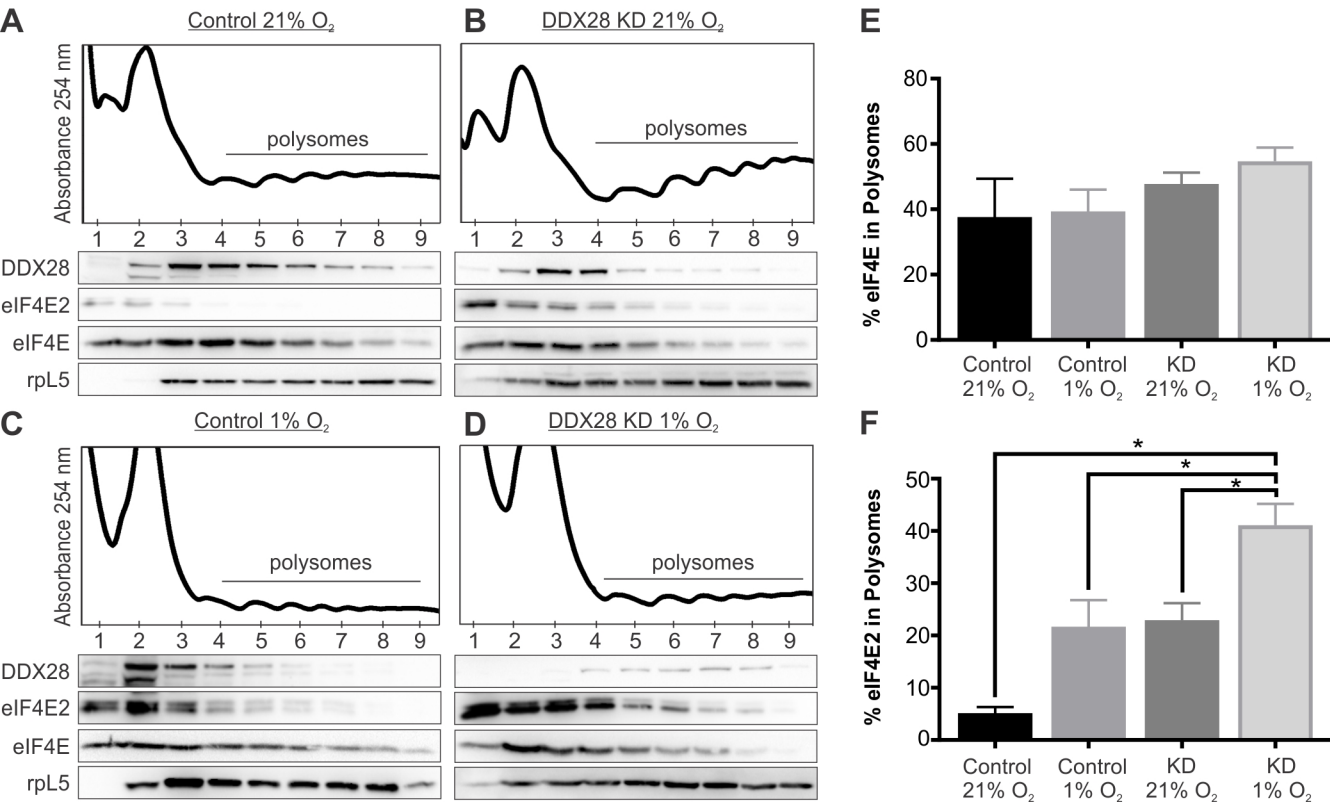

Figure 4

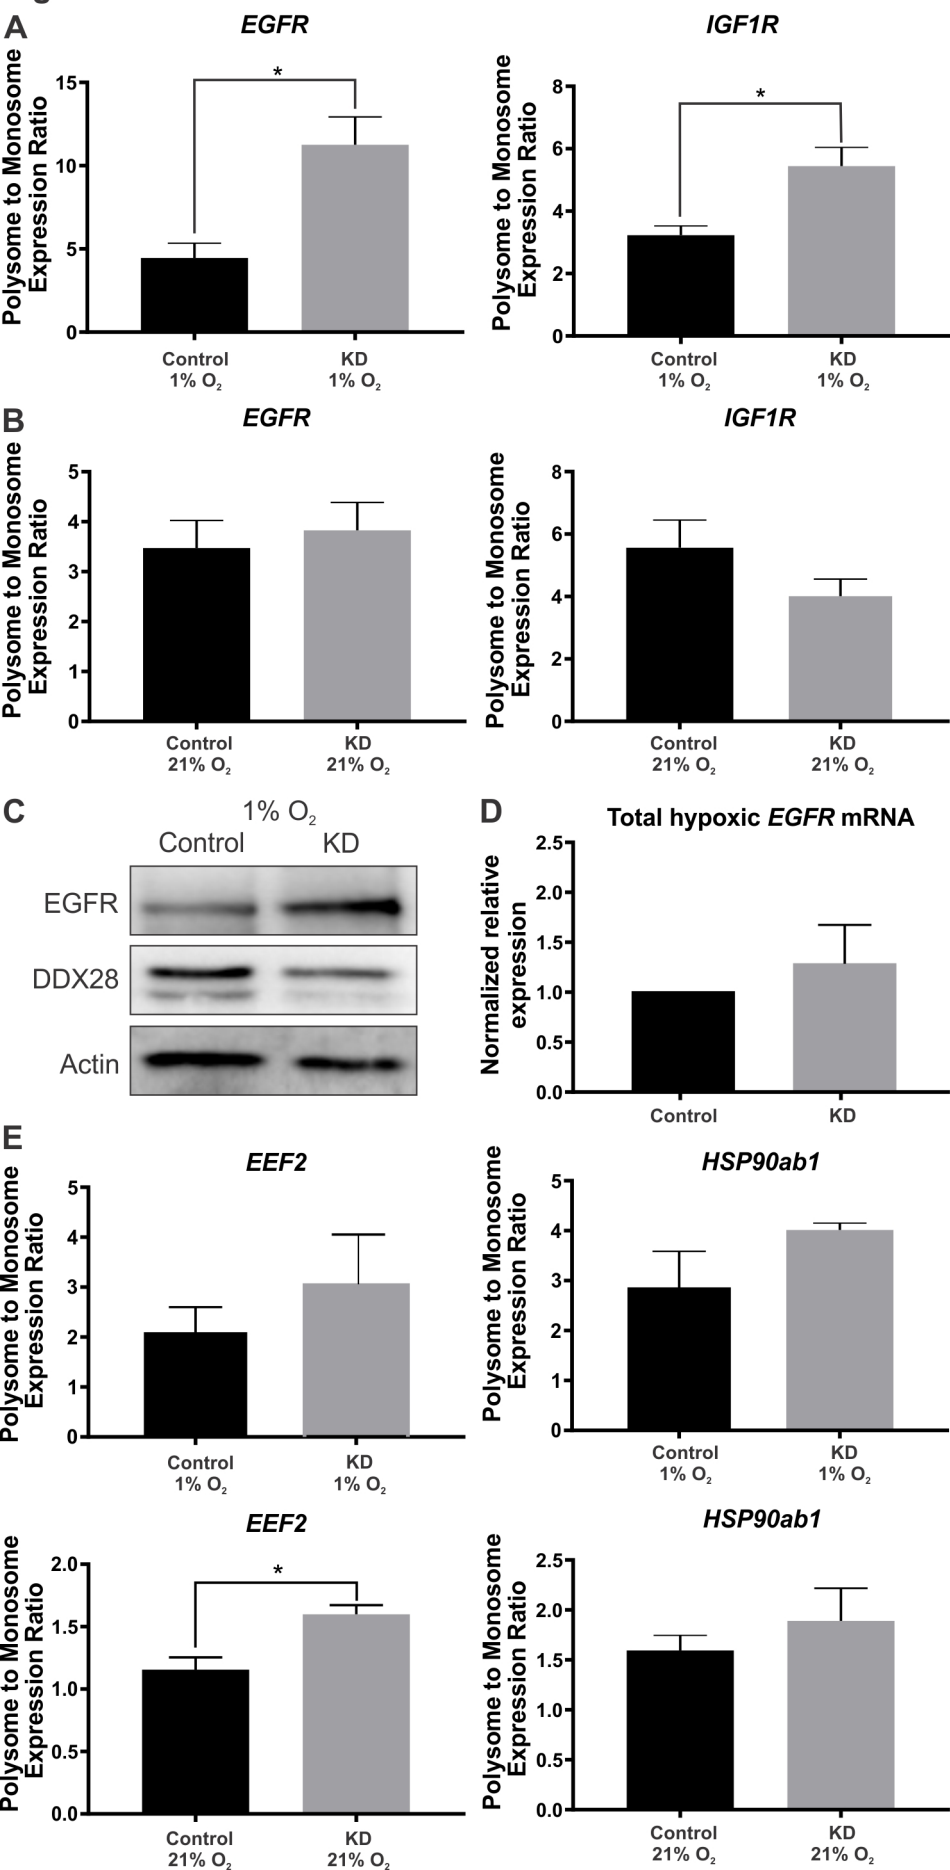

**Figure 5**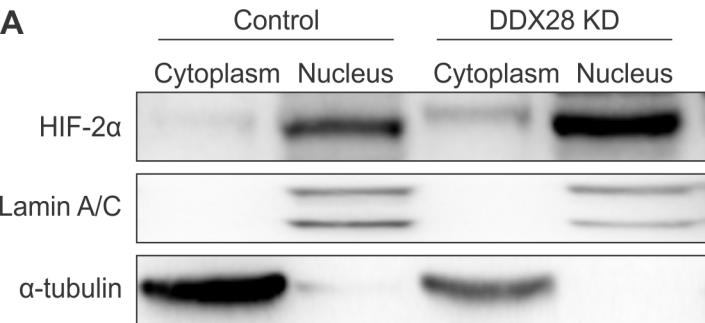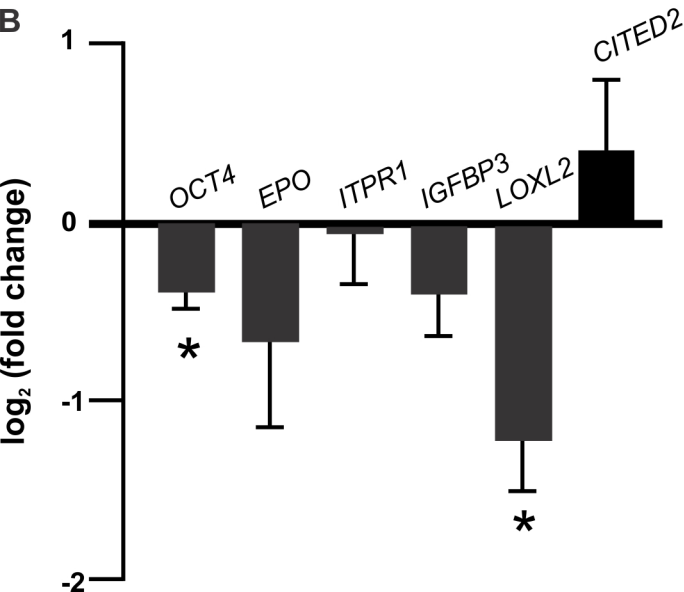

**Figure 6**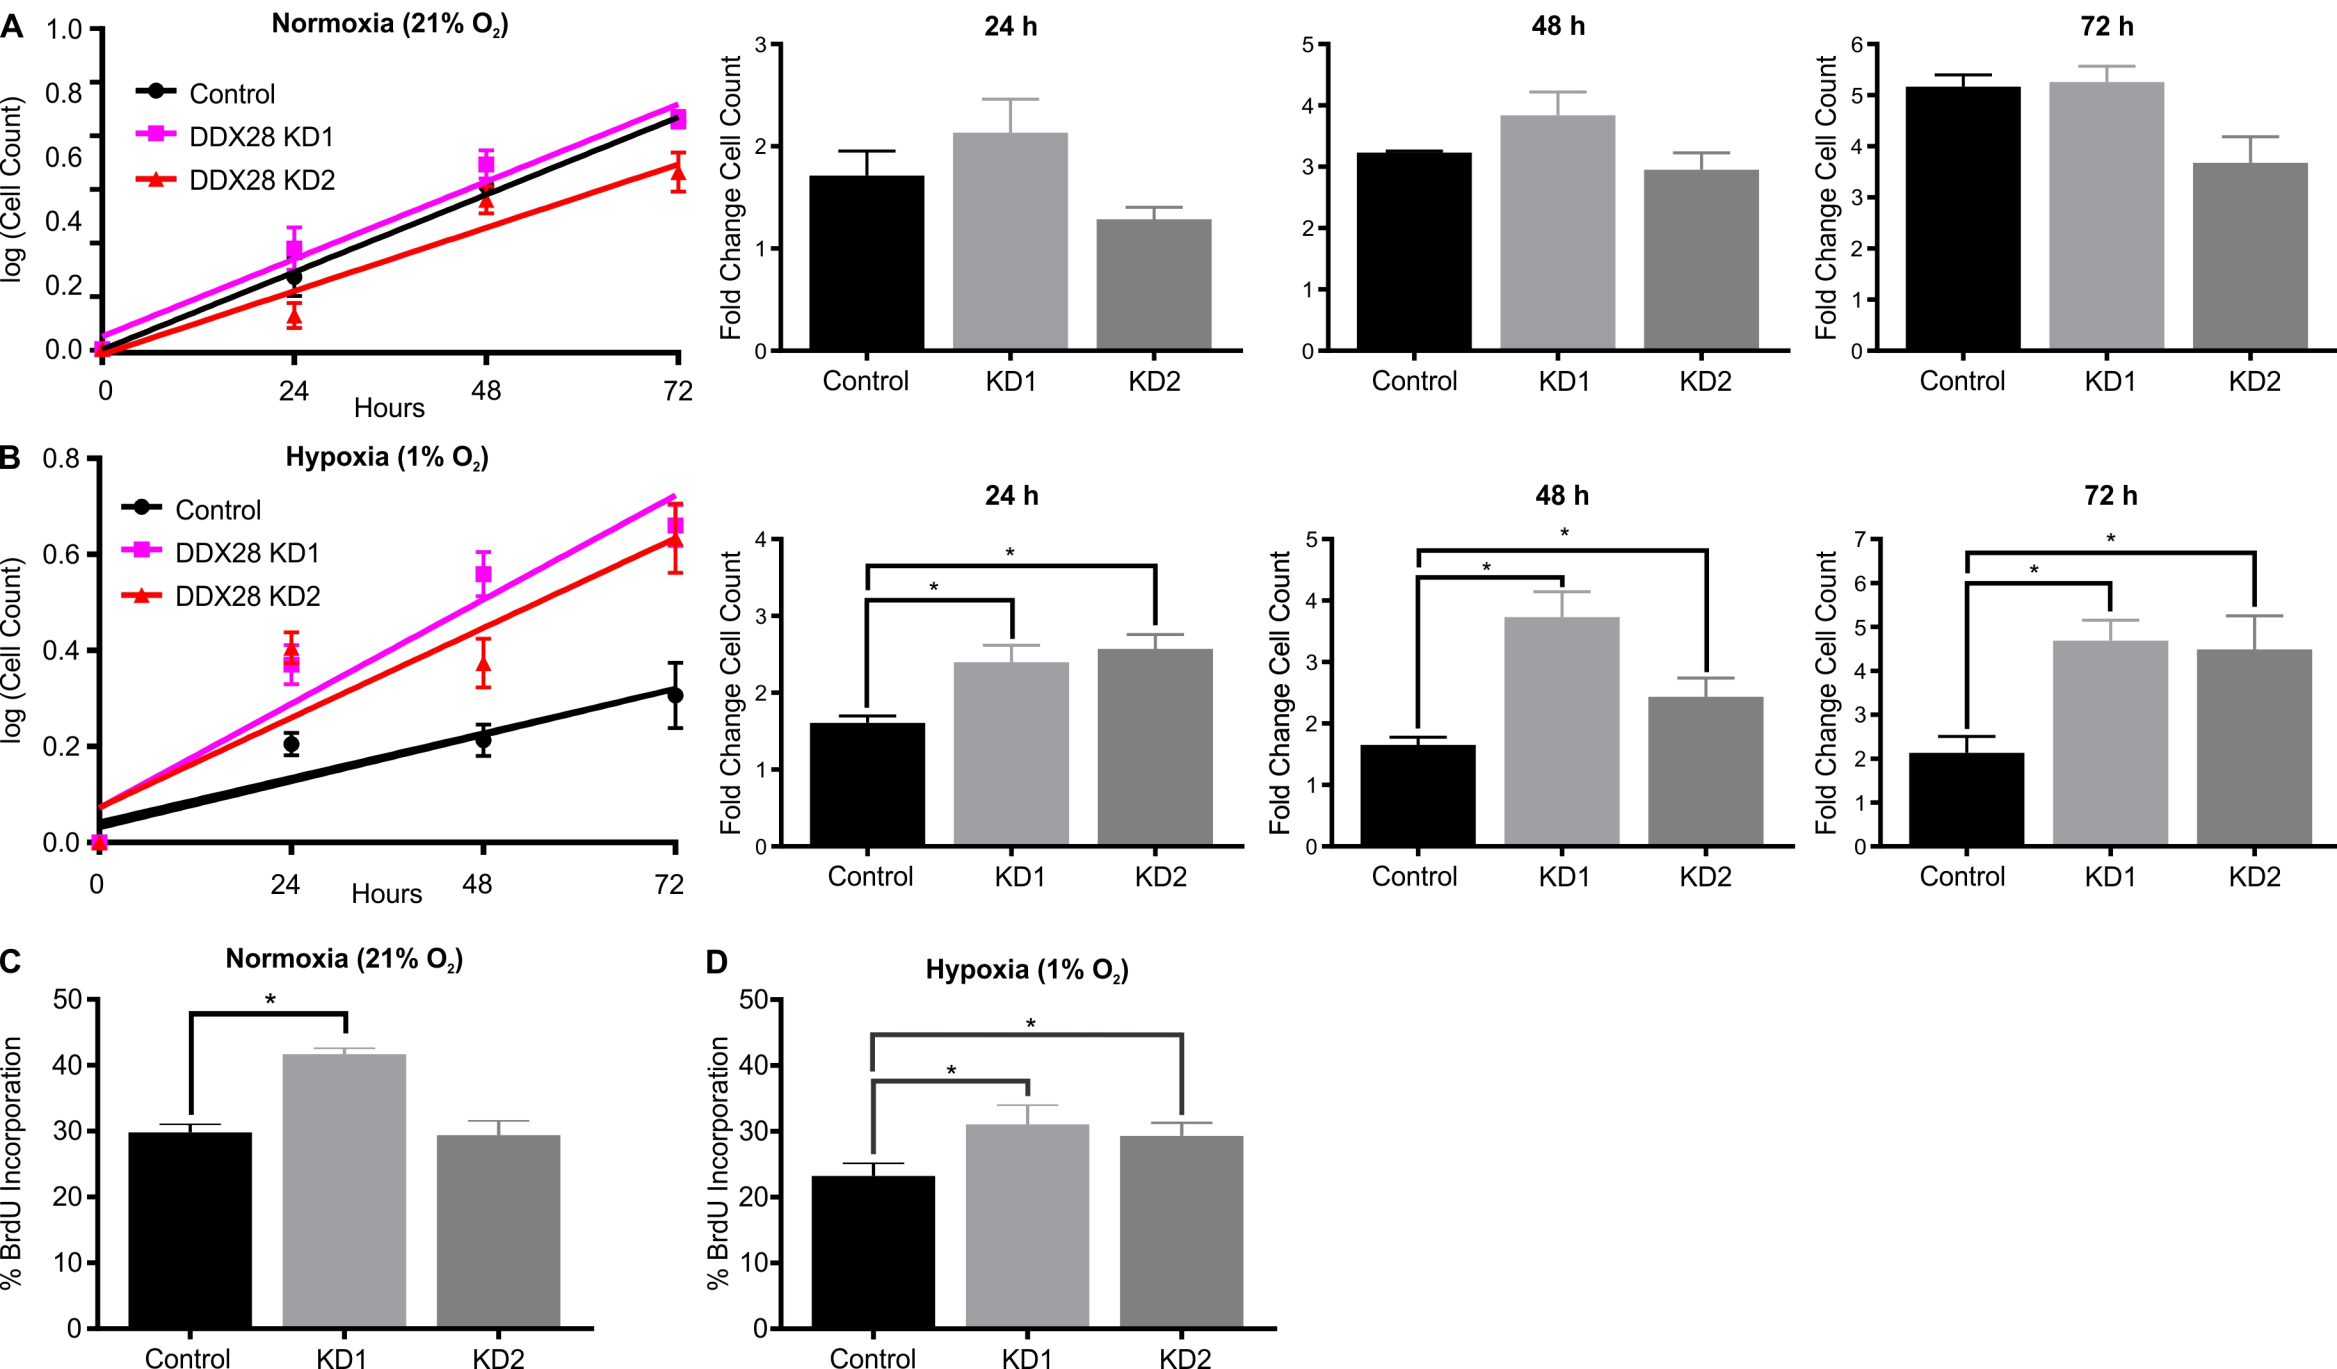

**Figure 7**

**A** Low [DDX28] as in hypoxia

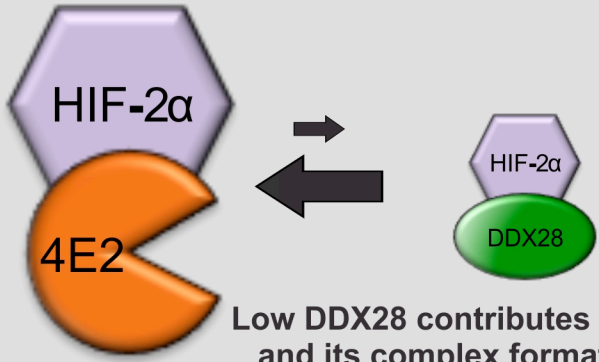

Low DDX28 contributes to HIF-2α stability and its complex formation with eIF4E2

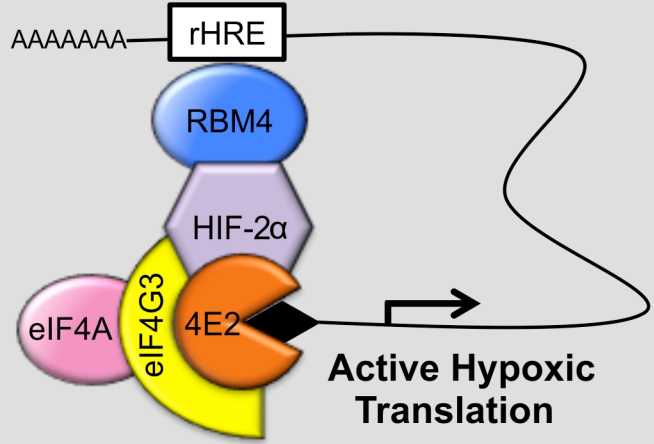

Active Hypoxic Translation

**B** Normal [DDX28] as in normoxia

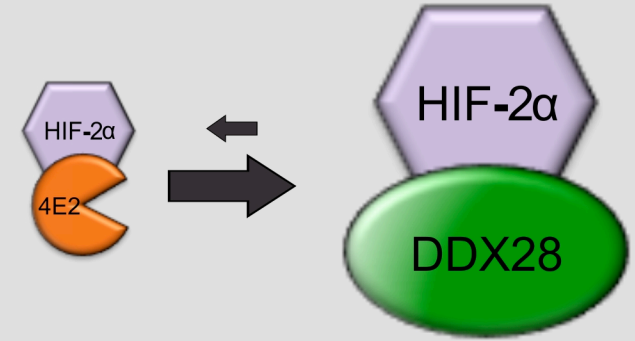

Destablization and reduction in HIF-2α levels

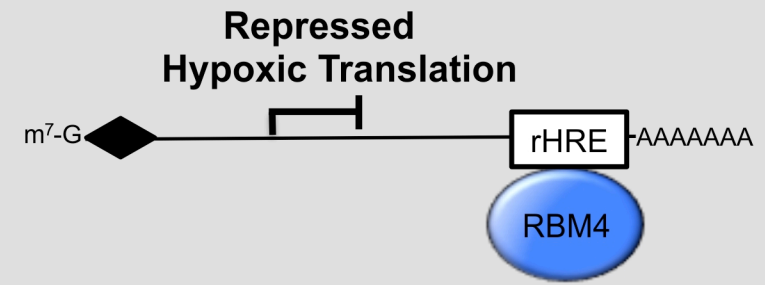

Repressed Hypoxic Translation
